# Supplementary material for: In situ synthesis of gold nanoparticles (AuNPs) in butterfly wings for surface enhanced Raman spectroscopy (SERS)
Source: Royal Society of Chemistry journal article supplement (doi:10.1039/c3tb00500c), 2013-01-01
Supplement: c3tb00500c.pdf [file c3tb00500c.pdf]

## Electronic supplementary information

# ***In Situ* Synthesis of Gold Nanoparticles (AuNPs) in Butterfly Wings for Surface Enhanced Raman Spectroscopy (SERS)**

**Zhongde Mu, Xiangwei Zhao\*, Zhuoying Xie, Yuanjin Zhao, Qifeng Zhong, Ling Bo, Zhongze Gu\***

E-mail: xwzhao@seu.edu.cn; gu@seu.edu.cn

**Table S1** Speci-belongings of the three butterflies in this study

|         |                        |                                  |                                    |
|---------|------------------------|----------------------------------|------------------------------------|
| Kingdom | <i>Animalia</i>        |                                  |                                    |
| Phylum  | <i>Arthropoda</i>      |                                  |                                    |
| Class   | <i>Insecta</i>         |                                  |                                    |
| Order   | <i>Lepidoptera</i>     |                                  |                                    |
| Family  | <i>Nymphalidae</i>     | <i>Papilionidae</i>              |                                    |
| Genus   | <i>Morpho</i>          | <i>Papilio</i>                   | <i>Ornithoptera</i>                |
| Species | <i>Morpho menelaus</i> | <i>Papilio ulysses telegonus</i> | <i>Ornithoptera croesus lydius</i> |

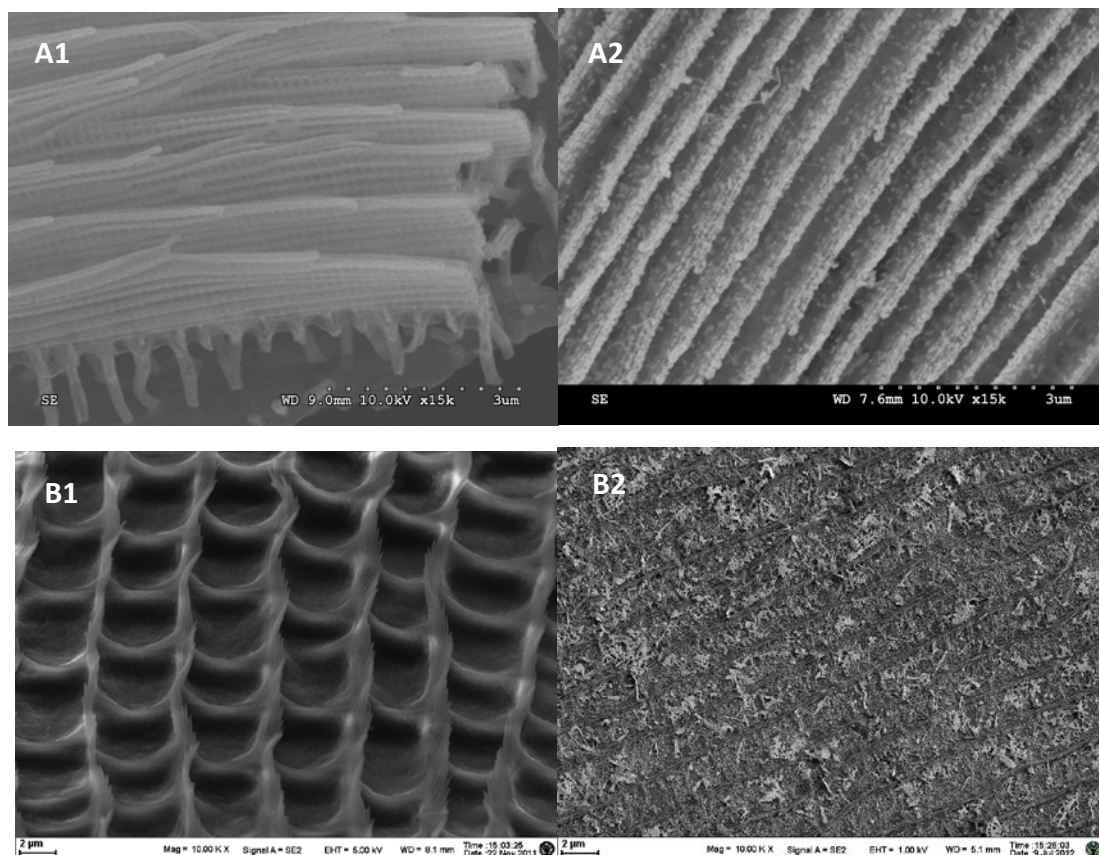

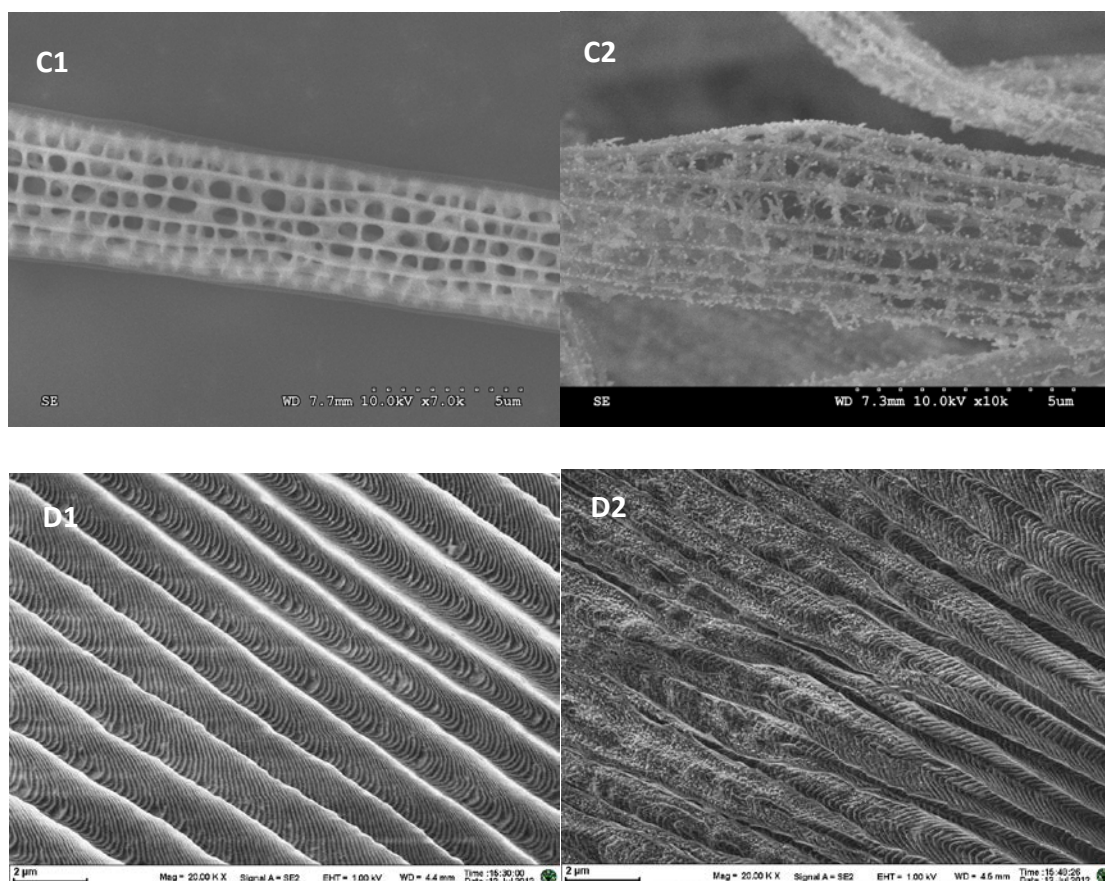

Figure S1. SEM images of (A) *M. menelaus*, (B) blue region and (C) fiber region of *P. u. telegonus*, (D) *O. c. lydius*, (1) before and (2) after the whole treatment.

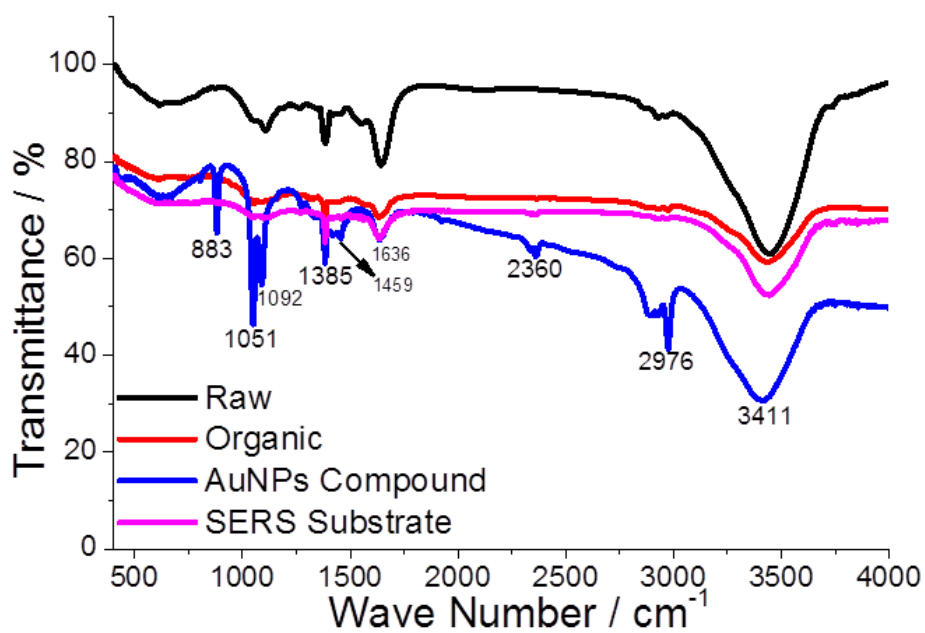

Figure S2. FTIR spectra of the *Morpho menelaus* wing at each stage  
From organic component of *M. menelaus* to AuNPs organic compound,  $1458\text{cm}^{-1}$  peak emerged

and  $1642\text{cm}^{-1}$  shifted to  $1636\text{cm}^{-1}$ . The emerging and shifting also confirms that the amine of the organic component is coordinated to gold nanoparticle<sup>1</sup> for the stabilization of the gold nanoparticle.(Ref. 35, 36 in the manuscript)
